# Supplementary material for: Lecithin derived from ω-3 PUFA fortified eggs decreases blood pressure in spontaneously hypertensive rats
Source: PubMed Central journal article supplement (PMC5620069; doi:10.1038/s41598-017-12019-w), 2017-09-28
Supplement: 41598_2017_12019_MOESM1_ESM.pdf [file 41598_2017_12019_MOESM1_ESM.pdf]

## Supplementary Information

*Lecithin derived from  $\omega$ -3 PUFA fortified eggs decreases blood pressure in spontaneously hypertensive rats*

Nowacki D., Martynowicz H., Skoczyńska A., Wojakowska A., Turczyn B., Bobak Ł., Trziszka T., Szuba A.

**Supplementary Table S1.** The percentage of the fatty acids in the phospholipid fraction isolated from egg yolk.

| <b>Phospholipid fraction</b>                               | <b>[%]</b>  |
|------------------------------------------------------------|-------------|
| Purity as a substance insoluble in acetone                 | 73.00       |
| Phosphatidylcholine                                        | 81.72       |
| Phosphatidylethanolamine (PE)                              | 18.27       |
| <b>The fatty acid profile of the phospholipid fraction</b> |             |
|                                                            | <b>[%]</b>  |
| Tetradecanoic acid                                         | C14:0 0.40  |
| Tetradecenoic acid                                         | C14:1 0.16  |
| Hexadecanoic acid                                          | C16:0 26.36 |
| Hexadecenoic acid                                          | C16:1 2.52  |
| Heptadecanoic acid                                         | C17:0 0.24  |
| Octadecanoic acid                                          | C18:0 14.05 |
| Octadecenoic acid (kwas oleic; OA)                         | C18:1 29.66 |
| Octadecadienoic acid (kwas linoleic; LA)                   | C18:2 13.08 |
| $\alpha$ -linolenic acid (octadecatrienoic; ALA)           | C18:3 3.12  |
| Eicosadienoic acid                                         | C20:2 0.18  |
| Eicosatrienoic acid                                        | C20:3 0.12  |
| Eicosatetraenoic acid (arachidonic acid; AA)               | C20:4 2.41  |
| Eicosapentaenoic acid (EPA)                                | C20:5 0.58  |
| Docosahexaenoic acid (DHA)                                 | C22:6 7.12  |
| $\omega$ -3                                                | 10.82       |
| $\omega$ -6                                                | 15.79       |
| $\omega$ 6/ $\omega$ 3                                     | 1.46        |
| Saturated fatty acids                                      | 41.05       |
| Unsaturated fatty acids                                    | 58.95       |
| Polyunsaturated fatty acids (PUFA)                         | 26.61       |
| Monounsaturated fatty acids (MUFA)                         | 32.34       |

**Supplementary Table S2.** Nutrition information table of PUFA pure chow (Labofeet B without linseed fraction) and Labofeet B standard chow.

|              | <b>Labofeet B without<br/>linseed fraction</b> | <b>Labofeet B<br/>standard</b> |
|--------------|------------------------------------------------|--------------------------------|
|              | <b>amount per 100 g</b>                        |                                |
| Energy       | 272.28 kcal                                    | 274.67 kcal                    |
| Protein      | 17.5 g                                         | 17.7 g                         |
| Carbohydrate | 73.81 g                                        | 72.79 g                        |
| Fiber        | 6.34 g                                         | 6.42g                          |
| Total fat    | 3.14 g                                         | 3.87 g                         |
| Linseed fat  | 0 mg                                           | 730 mg                         |
| PUFA         | 9.78 mg                                        | 506.3 mg                       |
| MUFA         | < 2.1 mg                                       | 129.9 mg                       |
